# Supplementary material for: Efficaciousness of dexmedetomidine in children undergoing cleft lip and palate repair: a systematic review and meta-analysis
Source: HighWire-hosted journal article supplement (doi:10.1136/bmjopen-2020-046798), 2021-08-01
Supplement: bmjopen-2020-046798supp003_data_supplement.pdf [file bmjopen-2020-046798supp003_data_supplement.pdf]

| outcomes                                     | study | Begg's Test |
|----------------------------------------------|-------|-------------|
| EA                                           | 7     | 0.086       |
| PONV                                         | 8     | 0.060       |
| Respiratory adverse events                   | 8     | 0.230       |
| Cardiovascular adverse events                | 2     | –           |
| The need for postoperative rescue analgesics | 5     | 0.462       |

**EA:**

| study      | Dexmedetomidine group |       | Control group |       |
|------------|-----------------------|-------|---------------|-------|
|            | events                | Total | events        | total |
| Ju2013     | 0                     | 40    | 0             | 40    |
| Luo2017    | 4                     | 50    | 4             | 50    |
| Mei2014    | 0                     | 30    | 1             | 30    |
| Obayah2010 | 4                     | 15    | 3             | 15    |
| Peng2015   | 1                     | 20    | 2             | 20    |
| Surana2017 | 0                     | 30    | 0             | 30    |
| Xiao2012   | 1                     | 18    | 2             | 18    |

**Begg's test**

adj. Kendall's Score (P-Q) = -8  
 Std. Dev. of Score = 4.08  
 Number of Studies = 5  
 $z = -1.96$   
 $Pr > |z| = 0.050$   
 $z = 1.71$  (continuity corrected)  
 $Pr > |z| = 0.086$  (continuity corrected)

## PONV

| study        | Dexmedetomidine group |       | Control group |       |
|--------------|-----------------------|-------|---------------|-------|
|              | events                | Total | events        | Total |
| Ju2013       | 0                     | 40    | 0             | 40    |
| Luo2017      | 4                     | 50    | 4             | 50    |
| Mei2014      | 0                     | 30    | 1             | 30    |
| Obayah2010   | 4                     | 15    | 3             | 15    |
| Peng2015     | 1                     | 20    | 2             | 20    |
| Surana2017   | 0                     | 30    | 0             | 30    |
| Xiao2012     | 1                     | 18    | 2             | 18    |
| El-Emam 2019 | 4                     | 50    | 3             | 50    |

**Begg's test**

adj. Kendall's Score (P-Q) = -11  
 Std. Dev. of Score = 5.32  
 Number of Studies = 6  
 $z = -2.07$   
 $Pr > |z| = 0.039$   
 $z = 1.88$  (continuity corrected)  
 $Pr > |z| = 0.060$  (continuity corrected)

**Respiratory adverse events**

| study      | Dexmedetomidine group |       | Control group |        |
|------------|-----------------------|-------|---------------|--------|
|            | events                | Total | study         | events |
| Boku2015   | 2                     | 35    | 2             | 35     |
| Ju2013     | 0                     | 40    | 4             | 40     |
| Luo2017    | 2                     | 30    | 4             | 30     |
| Mei2014    | 13                    | 50    | 25            | 50     |
| Peng2015   | 1                     | 20    | 3             | 20     |
| Surana2017 | 0                     | 30    | 0             | 30     |
| Xiao2012   | 0                     | 18    | 2             | 36     |
| Xi2012     | 1                     | 30    | 5             | 30     |

**Begg's test**

adj. Kendall's Score (P-Q) = -9  
 Std. Dev. of Score = 6.66  
 Number of Studies = 7  
 $z = -1.35$   
 $Pr > |z| = 0.176$   
 $z = 1.20$  (continuity corrected)  
 $Pr > |z| = 0.230$  (continuity corrected)

### The need for postoperative rescue analgesics

| study        | Dexmedetomidine group |       | Control group |        |
|--------------|-----------------------|-------|---------------|--------|
|              | events                | Total | study         | events |
| Mostafa 2020 | 0                     | 15    | 15            | 15     |
| Obayah2010   | 10                    | 15    | 15            | 15     |
| Luo2017      | 5                     | 46    | 29            | 47     |
| Surana2017   | 7                     | 30    | 20            | 30     |
| Ju2013       | 2                     | 40    | 8             | 40     |

#### Begg's test

adj. Kendall's Score (P-Q) = -4  
Std. Dev. of Score = 4.08  
Number of Studies = 5  
z = -0.98  
Pr > |z| = 0.327  
z = 0.73 (continuity corrected)  
Pr > |z| = 0.462 (continuity corrected)
